# Supplementary material for: Local electrochemical activity of transition metal dichalcogenides and their heterojunctions on 3D-printed nanocarbon surfaces
Source: Royal Society of Chemistry journal article supplement (doi:10.1039/d0nr06679f), 2021-01-01
Supplement: d0nr06679f1.pdf [file d0nr06679f1.pdf]

Supporting information

***Local Electrochemical Activity of Transition Metal Dichalcogenides and  
Their Heterojunctions on 3D-Printed Nanocarbon Surfaces***

Katarina A. Novčić<sup>a</sup>, Christian Iffelsberger<sup>a</sup>, Siowwoon Ng<sup>a</sup> and Martin Pumera<sup>a,b,c,d\*</sup>

<sup>a</sup>Future Energy and Innovation Laboratory, Central European Institute of Technology, Brno University of Technology, Purkyňova 123, 61200 Brno, Czech Republic.

<sup>b</sup>Department of Chemistry and Biochemistry, Mendel University in Brno, Zemedelska 1, CZ-613 00, Brno, Czech Republic

<sup>c</sup>Department of Chemical and Biomolecular Engineering, Yonsei University, 50 Yonsei-ro, Seodaemun-gu, Seoul 03722, Korea.

<sup>d</sup>Department of Medical Research, China Medical University Hospital, China Medical University, No. 91 Hsueh Road, Taichung 40402, Taiwan.

\*E-mail: [pumera.research@gmail.com](mailto:pumera.research@gmail.com)

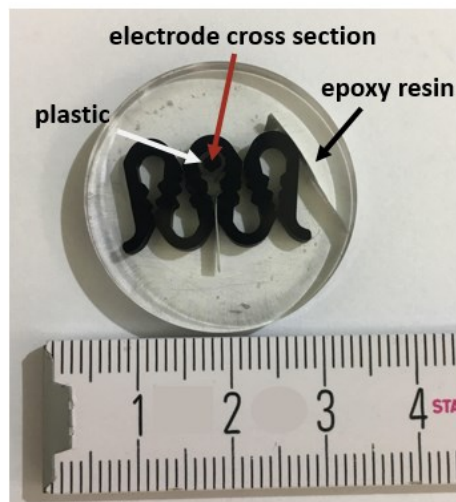

**Figure S1:** Photograph of the prepared sample cross section for the SECM measurement (scale is in cm).

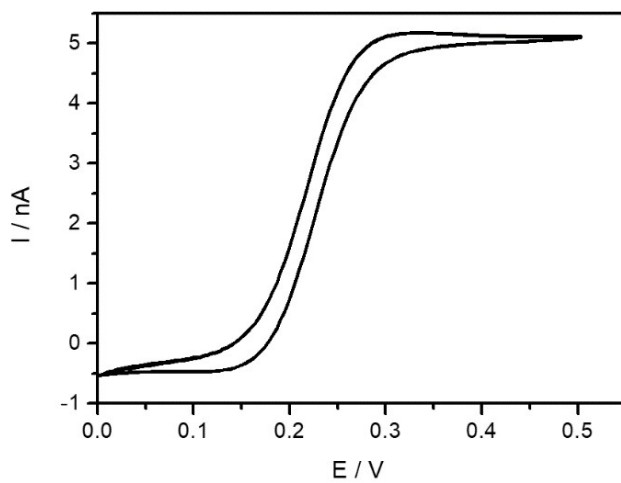

**Figure S2:** Cyclic voltammometry of 25  $\mu\text{m}$  diameter UME tip probe. Measurement was performed in 1.5 mM FcMeOH and 0.2 M  $\text{KNO}_3$  mediator solution. Conditions: a scan rate of  $50 \text{ mV s}^{-1}$ , potential range from 0 V to 0.5 V, starting from open circuit potential.

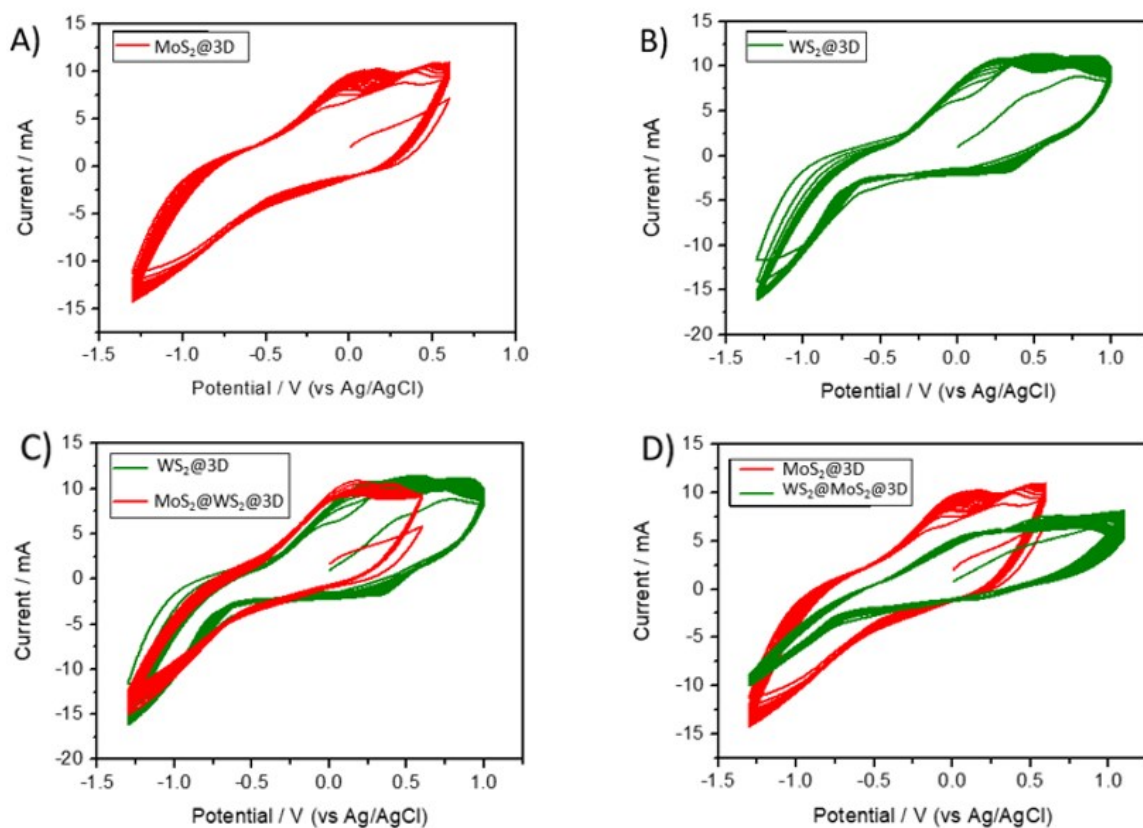

**Figure S3:** Cyclic voltammograms of electrochemical deposition for MoS<sub>2</sub>@3D (A), WS<sub>2</sub>@3D (B), WS<sub>2</sub>@3D (green curve) and MoS<sub>2</sub>@WS<sub>2</sub>@3D (red curve) (C), MoS<sub>2</sub>@3D (red curve) and WS<sub>2</sub>@MoS<sub>2</sub>@3D (green curve) electrodes (D).

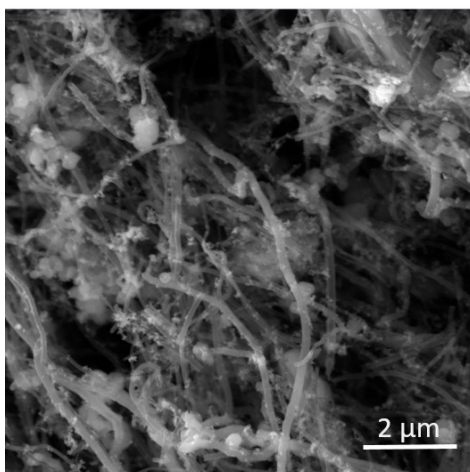

**Figure S4:** SEM micrograph of the thermally activated 3D-printed electrode.

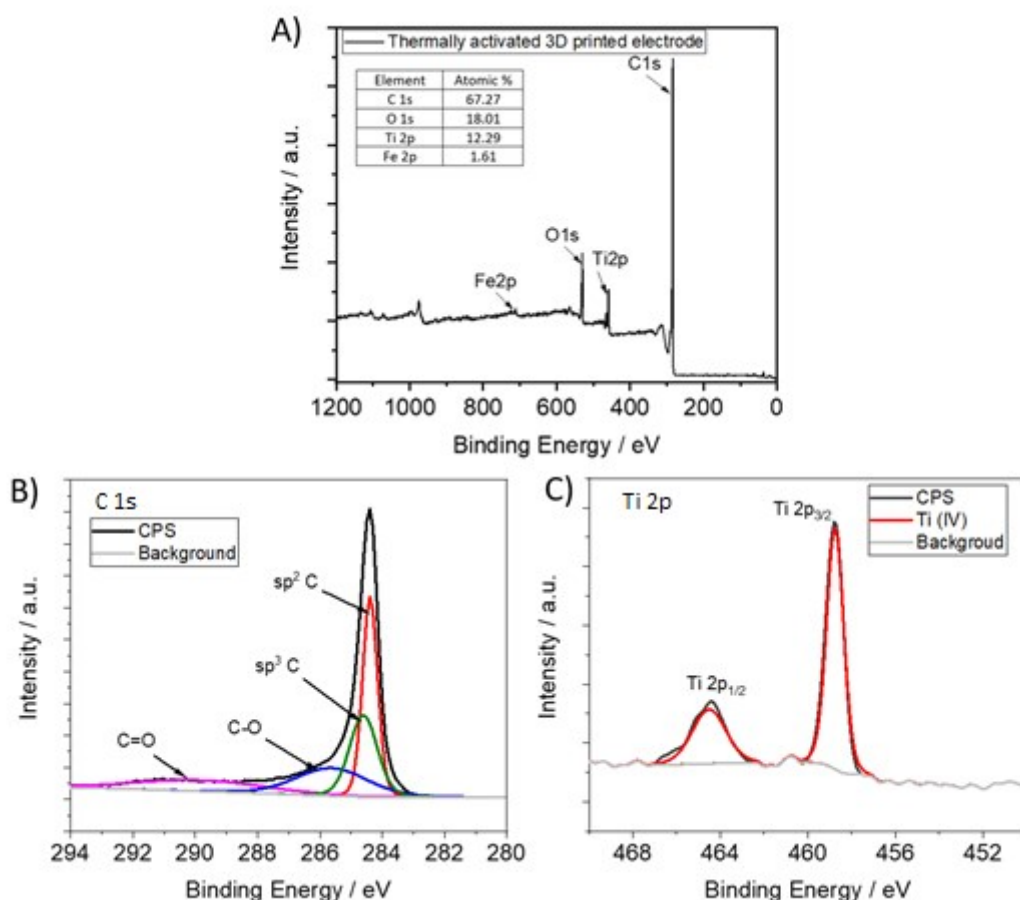

**Figure S5:** X-ray photoelectron spectroscopy study of the thermally activated 3D-printed electrode, survey spectra (A) and deconvolution of C1s (B), and Ti 2p (C).

#### **X-ray photoelectron spectroscopy of thermally activated 3D-printed electrode surface:**

The XPS survey spectrum of thermally activated 3D-printed electrodes is presented in Figure S5 A and confirms the presence of C, O, Ti and Fe on the electrode surface. The deconvolution of the C 1s (Figure S5 B) spectrum confirms the presence of carbon C=C sp<sup>2</sup> bond and other carbon functional groups such as C-O, C=O in the carbon-based filament. Moreover, the deconvolution of the Ti 2p spectrum (Figure S5 C) indicates the presence of Ti (IV) 2p<sub>1/2</sub> and Ti (IV) 2p<sub>3/2</sub> states observed at 464.5 eV and 458.7 eV, respectively, which points on the presence of TiO<sub>2</sub> and it is in line with the literature<sup>1-3</sup>.

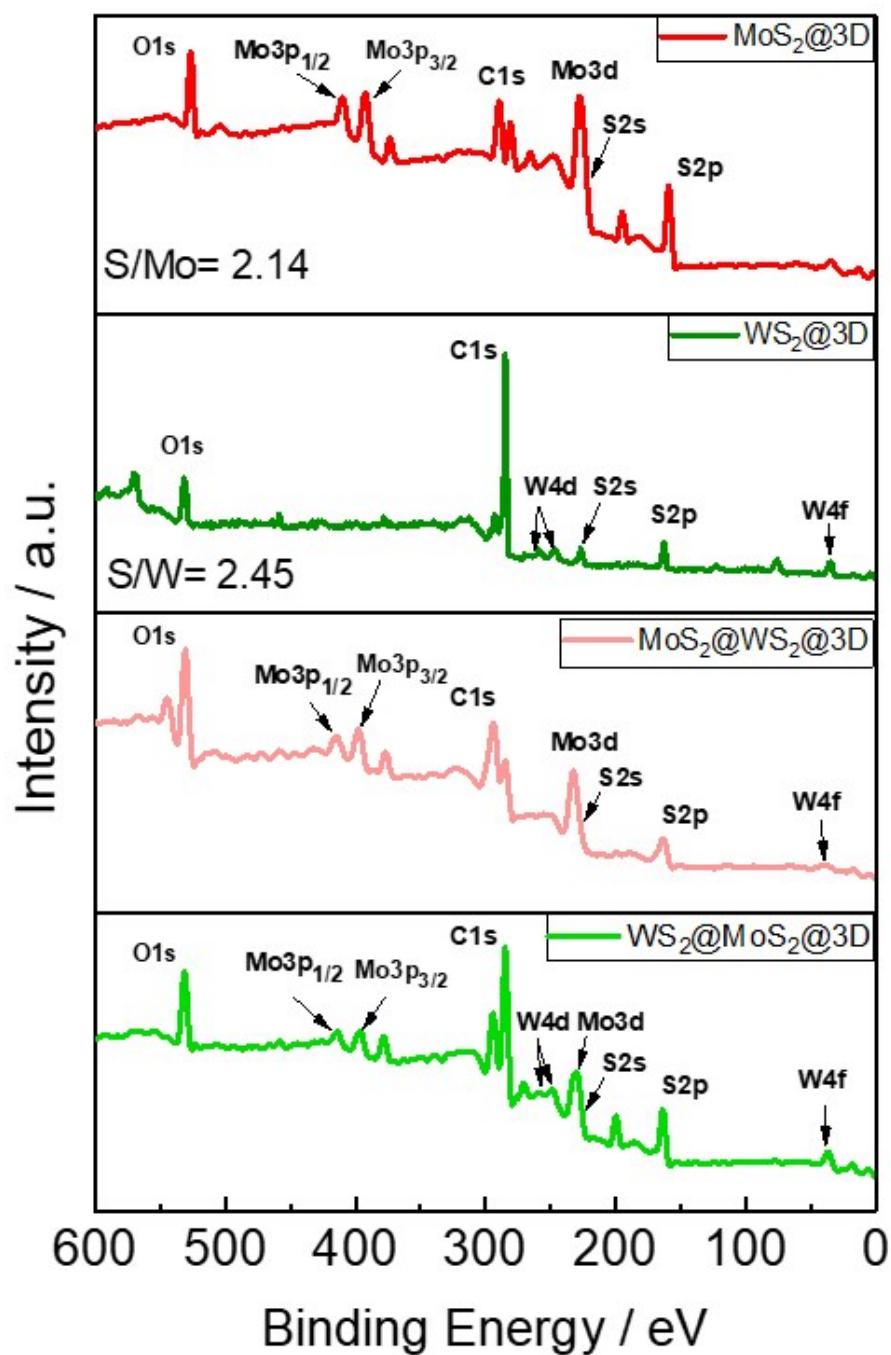

**Figure S6:** X-ray photoelectron spectroscopy study of the TMD modified thermally activated 3D-printed electrodes. Insets in the XPS survey spectrum for  $\text{MoS}_2@3\text{D}$  and  $\text{WS}_2@3\text{D}$  samples show the ratio between S and Mo (S/Mo) and S and W (S/W), respectively.

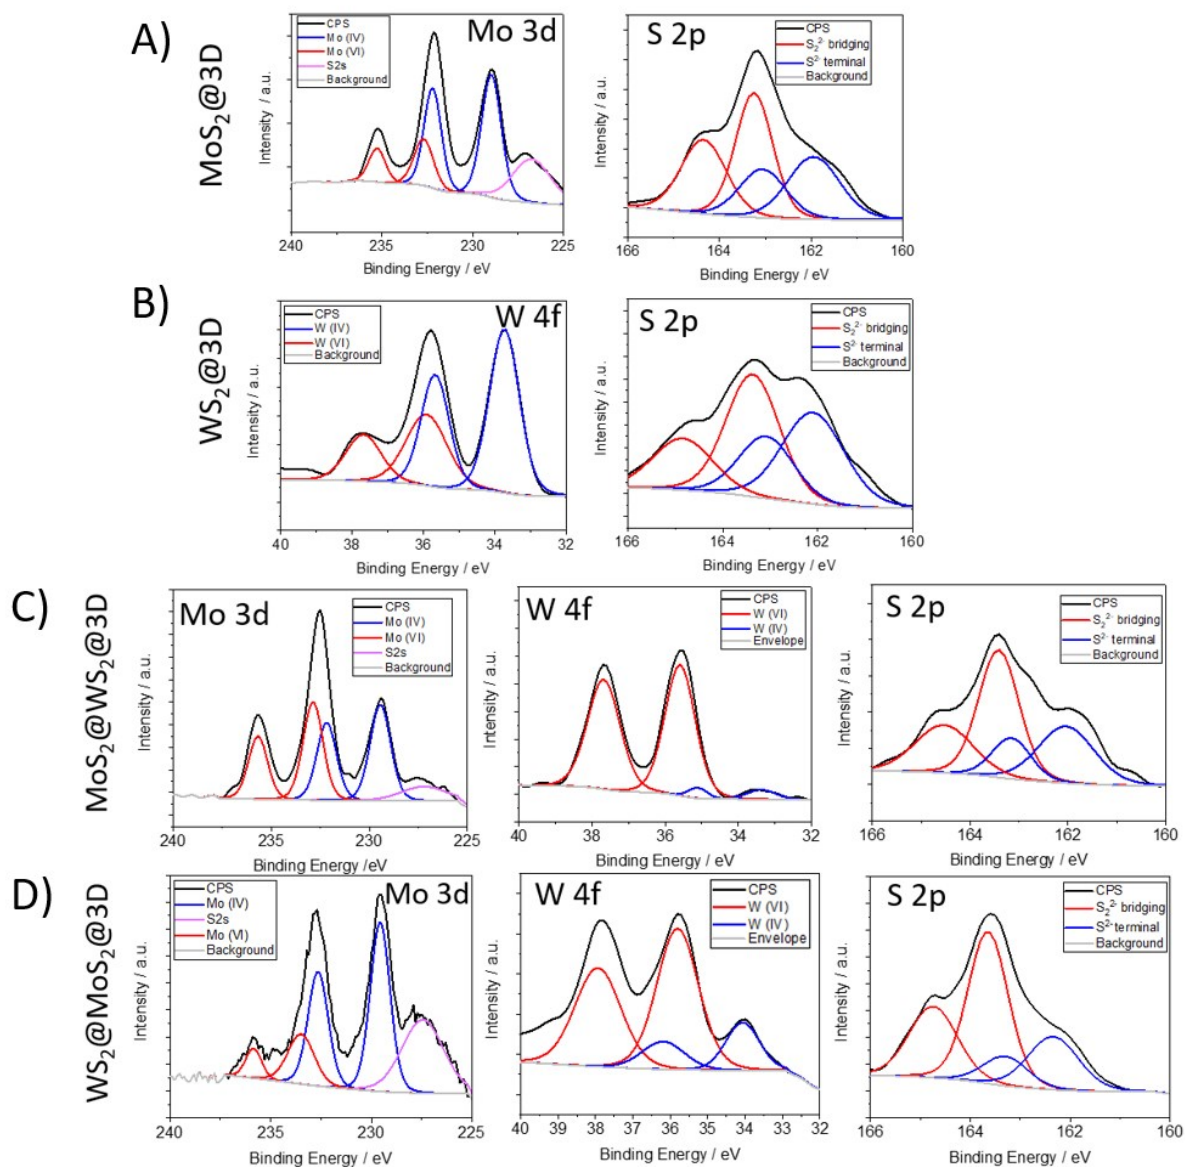

**Figure S7:** X-ray photoelectron spectroscopy study of the specific element deconvolutions for Mo 3d, W 4f and S 2p for the MoS<sub>2</sub>@3D (A), WS<sub>2</sub>@3D (B), MoS<sub>2</sub>@WS<sub>2</sub>@3D (C) and WS<sub>2</sub>@MoS<sub>2</sub>@3D (D) electrodes.

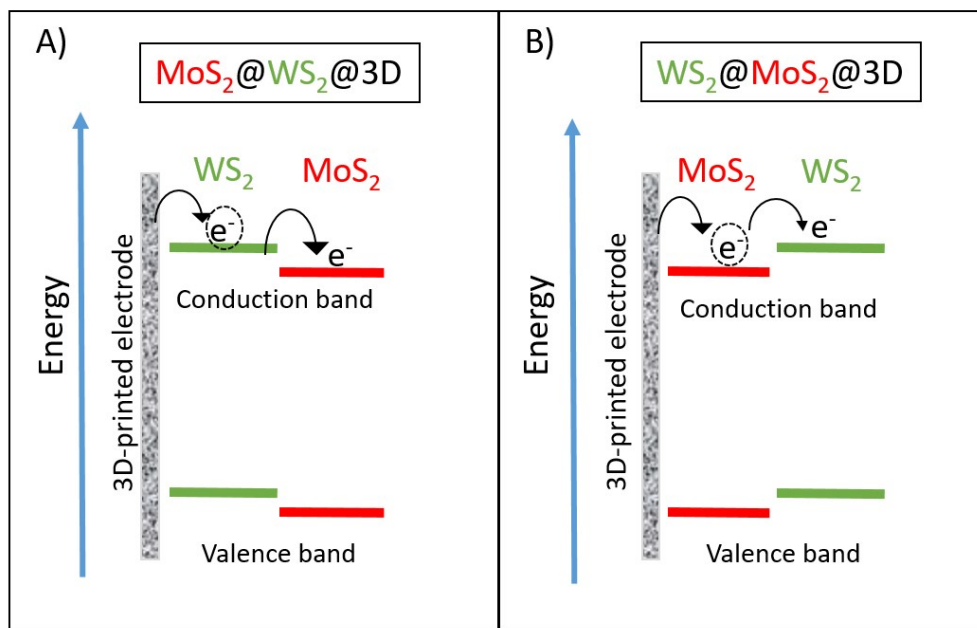

**Scheme S1:** Schematic energy band diagrams for MoS<sub>2</sub> and WS<sub>2</sub> in MoS<sub>2</sub>@WS<sub>2</sub>@3D (A) and WS<sub>2</sub>@MoS<sub>2</sub>@3D (B) electrodes. Band positions are estimated based on the literature<sup>4-6</sup>.

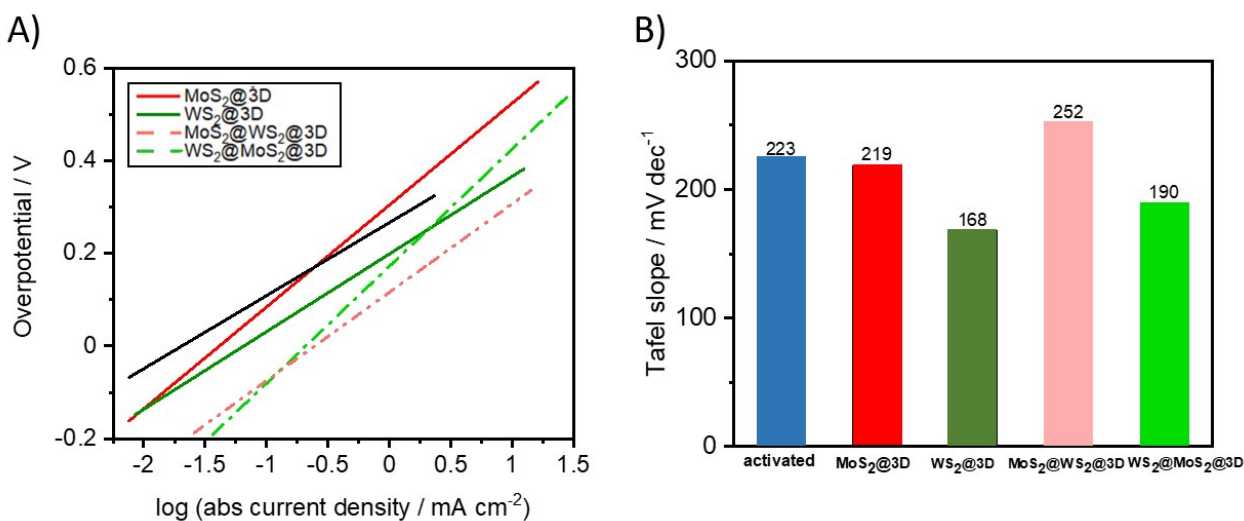

**Figure S8:** Tafel plots calculated from LSV measurements (A) and bar charts comparing the calculated Tafel slope values (B).

**Table S1:** Comparison of the active catalysts supported by 3D-printed platform for hydrogen evolution reaction.

| Catalyst                                          | Electrolyte                          | HER overpotential at -10 mA cm <sup>-2</sup> (V vs RHE) | Tafel slope / mV dec <sup>-1</sup> | Ref.      |
|---------------------------------------------------|--------------------------------------|---------------------------------------------------------|------------------------------------|-----------|
| Ni-modified 3D-steel                              | 1M KOH                               | - 0.40                                                  | 131                                | [7]       |
| MoS <sub>2</sub> -modified-3D-steel               | 1M KOH                               | - 0.35                                                  | 120                                | [7]       |
| Ni-MoS <sub>2</sub> -modified-3D-steel            | 1M KOH                               | - 0.30                                                  | 106                                | [7]       |
| NiCo <sub>2</sub> S <sub>4</sub> -spray coated 3D | 0.5M H <sub>2</sub> SO <sub>4</sub>  | - 0.226                                                 | 38.7                               | [8]       |
| ReS <sub>2</sub> @3D*                             | 0.5 M H <sub>2</sub> SO <sub>4</sub> | - 0.28                                                  | 147                                | [9]       |
| MoS <sub>2</sub> spray coated 3D                  | 0.5 M H <sub>2</sub> SO <sub>4</sub> | ~- 0.55                                                 | N/A**                              | [10]      |
| MoS <sub>3-δ</sub> @3D                            | 0.5 M H <sub>2</sub> SO <sub>4</sub> | - 0.298                                                 | 119                                | [11]      |
| MoS <sub>2</sub> @3D                              | 0.5 M H <sub>2</sub> SO <sub>4</sub> | - 0.28                                                  | 220                                | this work |
| WS <sub>2</sub> @3D                               | 0.5 M H <sub>2</sub> SO <sub>4</sub> | - 0.53                                                  | 168                                | this work |
| MoS <sub>2</sub> @WS <sub>2</sub> @3D             | 0.5 M H <sub>2</sub> SO <sub>4</sub> | - 0.32                                                  | 152                                | this work |
| WS <sub>2</sub> @MoS <sub>2</sub> @3D             | 0.5 M H <sub>2</sub> SO <sub>4</sub> | - 0.43                                                  | 190                                | this work |

\*3D - 3D-printed electrode; \*\* N/A – not available

## References:

1. S. Yang, Y. Lin, X. Song, P. Zhang, L. Gao, *ACS Appl. Mater. Interfaces* 2015, 7, 32, 17884-17892.
1. S. Yang, Y. Lin, X. Song, P. Zhang, L. Gao, *ACS Appl. Mater. Interfaces* 2015, 7, 32, 17884-17892.
2. K. Ghosh, S. Ng, C. Iffelsberger, M. Pumera, *Chem. Eur. J.* 2020, 26, 67, 15746-15753.
3. M. P. Browne, V. Urbanova, J. Plutnar, F. Novotny, M. Pumera, *J. Mater. Chem. A* 2020, 8, 1120-1126.
4. V. Kaushik, M. Ahmad, K. Agarwal, D. Varandani, B.D. Belle, P. Das, B.R. Mehta, *J. Phys. Chem.C.* 2020, 124, 23368-23379.
5. L. Li, R. Long, O.V. Prezhdo, *Chem. Mater.* 2017, 29, 2466-2473.
6. Y. Liang, S. Huang, R. Soklaski, L. Yang, *Appl. Phys. Lett.* 2013, 103, 042106.
7. A. Ambrosi, M. Pumera, *ACS Sustain. Chem. Eng.* 2018, 6, 12, 16968-16975.
8. S. Chang, X. Huang, C.Y.A. Ong, L. Zhao, L. Li, X. Wang, J. Ding, *J. Mater. Chem. A*, 2019, 7, 18338-18347.
9. S. Ng, C. Iffelsberger, Z. Sofer, M. Pumera, *Adv. Funct. Mater.* 2020, 30, 1910193.
10. R. Gusmao, Z. Sofer, P. Marvan, M. Pumera, *Nanoscale* 2019, 11, 9888-9895.
11. C. Iffelsberger, S. Ng, M. Pumera, *Appl. Mater. Today* 2020, 20, 100654.
